# Supplementary material for: Bifunctional heterogeneous catalysts from biomass and waste polysaccharides for the conversion of CO2 into cyclic carbonates
Source: Royal Society of Chemistry journal article supplement (doi:10.1039/d2ta05906a), 2022-12-05
Supplement: d2ta05906a1.pdf [file d2ta05906a1.pdf]

SUPPLEMENTARY INFORMATION

## Bifunctional heterogeneous catalysts from biomass and waste polysaccharides for the conversion of CO<sub>2</sub> into cyclic carbonates

Adriano Parodi,<sup>\*,§,a</sup> Martina Vagnoni,<sup>\*,§,a</sup> Lucia Frontali,<sup>a</sup> Cristiano Albonetti,<sup>b</sup> Francesca De Giorgio,<sup>b</sup> Alessio Mezzi,<sup>c</sup> Elisabetta Petri,<sup>a</sup> Chiara Samori,<sup>a</sup> Francesca Soavi,<sup>a</sup> Giampiero Ruani,<sup>b</sup> Paola Galletti<sup>a</sup>

<sup>a</sup>Chemistry Department "Giacomo Ciamician", University of Bologna. Via Selmi, 2, 40126, Bologna (Italy)

<sup>b</sup>Consiglio Nazionale delle Ricerche, Istituto per lo Studio dei Materiali Nanostrutturati (CNR-ISMN). Via Piero Gobetti, 101 – 40129 Bologna (Italy)

<sup>c</sup>Consiglio Nazionale delle Ricerche, Istituto per lo Studio dei Materiali Nanostrutturati (CNR-ISMN). Via Salaria km 29.300 - 00015 Monterotondo Scalo (Italy)

### Contents

**S1** Comparison of various carbon-based and biobased heterogeneous catalysts, for the synthesis of styrene carbonate from CO<sub>2</sub> and styrene oxide

**S2** Char functionalization yields for each step (Table S2)

**S3** Elemental analysis of the functionalized chars over different reaction conditions (Table S3a) and their application in the synthesis of SC (Table S3b)

**S4** Elemental analysis of the chars functionalized with Bul and OctI over different conditions (Table S4a) and their application in the synthesis of SC (Table S4b)

**S5** Elemental analysis of the cellulose functionalized avoiding pyrolysis and oxidation steps (Table S5a) and their application in the synthesis of SC (Table S5b)

**S6** Weight of HC-FSD, HC-PC and HC-CA after each reaction cycle

**S7** Recycling catalytic test for HC-FSD with 5 wt% of catalyst loading

**S8** Elemental composition of the final catalysts HC-FSD after 5 cycles

**S9** Raman characterization

**S10** ATR-FTIR characterization of the starting materials

**S11** Morphological characterization (SEM)

**S12** Band assignment of the ATR-FTIR spectra of pristine cellulose- and sawdust-derived chars shown in Fig. 2a-d

**S13** <sup>1</sup>H and <sup>13</sup>C NMR spectra of isolated PRODUCT 2a (Table 6, entry 1)

**S14**  $^1\text{H}$  and  $^{13}\text{C}$  NMR spectra of isolated PRODUCT 2b (Table 6, entry 2)

**S15**  $^1\text{H}$  and  $^{13}\text{C}$  NMR spectra of isolated PRODUCT 2c (Table 6, entry 3)

**S16**  $^1\text{H}$  and  $^{13}\text{C}$  NMR spectra of isolated PRODUCT 2d (Table 6, entry 4)

**S17**  $^1\text{H}$  and  $^{13}\text{C}$  NMR spectra of isolated PRODUCT 2e (Table 6, entry 5)

**S18** XPS quantitative analysis and BE value of the HCs

**S19** HCs Active sites quantification

**S20** Comparison of the spectra of C1s, O1s, N1s, Si2p and I3d of the HC-FSD and HC-FSD-5Cy samples

## **Bibliography**

## S1 Comparison of various carbon-based and biobased heterogeneous catalysts, for the synthesis of styrene carbonate from CO<sub>2</sub> and styrene oxide

| Starting                                | Catalyst                                                                            | w/w %    | Co-catalyst | mol% | Pressure [MPa] | T [°C] | Time [h] | Yield <sup>a</sup> [%]     | TON <sup>d</sup> | TOF [h <sup>-1</sup> ] | Productivity [h <sup>-1</sup> ] | Reference |
|-----------------------------------------|-------------------------------------------------------------------------------------|----------|-------------|------|----------------|--------|----------|----------------------------|------------------|------------------------|---------------------------------|-----------|
| Hard- and softwood residues             |    | 2.5      | TBAB        | 1    | 1              | 110    | 6        | 71.9 (Conv.)               | 71,9             | 12,0                   | 6,1                             | [1]       |
| Graphene oxide                          |    | 2.5      | TBAI        | 1    | 0.1            | 100    | 27       | 94                         | 94               | 3,5                    | 1,5                             | [2]       |
|                                         |                                                                                     |          |             |      | 1              | 70     | 12       | 98                         | 98               | 8,2                    | 3,6                             |           |
| Graphene oxide                          |    | 2.9      | -           | -    | 2              | 120    | 3        | 56.9 (Sel. 96.2)           | 87,5             | 29,2                   | 8,9                             | [3]       |
| Cellulose                               |    | 0.4 mol% | -           | -    | 1.2            | 120    | 4        | 93                         | 232,5            | 58,1                   | n.a.                            | [4]       |
| Cellulose                               |    | 0.8      | -           | -    | 1.5            | 130    | 5        | 96.1 (Sel. 96.9)           | na               | na                     | 3,1                             | [5]       |
| Lignin                                  | Lignin                                                                              | 0.7 mol% | KI          | 2    | 2              | 140    | 12       | 87 <sup>c</sup>            | 43,5             | 3,6                    | 3,6                             | [6]       |
| Lignin                                  |    | 0.8      | TBAB        | 10   | 1              | 110    | 3        | 90 <sup>c</sup>            | 9                | 3,0                    | 1,5                             | [7]       |
| Luffa sponge (lignocellulosic material) |   | 8.3      | TBAB        | 9    | 1              | 90     | 5        | 94 <sup>c</sup> (Sel. >99) | 10,4             | 2,1                    | 1,1                             | [8]       |
| Chitosan                                |  | 4.5      | -           | -    | 1.17           | 120    | 6        | 80 (Sel. >99)              | 57,2             | 9,5                    | 4,1                             | [9]       |
| Chitosan                                |  | 6.9      | TBAB        | 1    | 0.1            | 80     | 4        | 95 <sup>c</sup>            | 95,0             | 23,8                   | 12,1                            | [10]      |
| Mesoporous zeolite-chitosan             |  | 2.4      | TBAI        | 2    | 1              | 100    | 6        | 77 <sup>b</sup>            | 63,1             | 10,5                   | 4,7                             | [11]      |
| Potato Starch                           |  | 10       | -           | -    | 0.3            | 70     | 7        | 82 <sup>c</sup>            | 26.9             | 3.8                    | 1.6                             | This work |
| Starch-Based Plastic Bags               |                                                                                     |          |             |      |                |        |          | 88 <sup>c</sup>            | 26               | 3.7                    | 1.7                             |           |
| Pristine Cellulose                      |                                                                                     |          |             |      |                |        |          | 86 <sup>c</sup>            | 25.1             | 3.6                    | 1.7                             |           |
| Fir Sawdust                             |                                                                                     |          |             |      |                |        |          | 91 <sup>c</sup>            | 27.5             | 3.9                    | 1.8                             |           |
| Cellulose Acetate                       |                                                                                     |          |             |      |                |        |          | 86 <sup>c</sup>            | 26.9             | 3.8                    | 1.7                             |           |
| Post-Use Cigarette Filters              |                                                                                     |          |             |      |                |        |          | 84 <sup>c</sup>            | 25.4             | 3.6                    | 1.6                             |           |
| Potato Starch                           |  | 5        | -           | -    | 0.3            | 70     | 7        | 72 <sup>c</sup>            | 47.2             | 6.7                    | 2.8                             | This work |
| Starch-Based Plastic Bags               |                                                                                     |          |             |      |                |        |          | 79 <sup>c</sup>            | 46.9             | 6.7                    | 3.1                             |           |
| Pristine Cellulose                      |                                                                                     |          |             |      |                |        |          | 77 <sup>c</sup>            | 45.1             | 6.4                    | 3.0                             |           |
| Fir Sawdust                             |                                                                                     |          |             |      |                |        |          | 80 <sup>c</sup>            | 48.4             | 6.9                    | 3.2                             |           |
| Cellulose Acetate                       |                                                                                     |          |             |      |                |        |          | 77 <sup>c</sup>            | 48               | 6.9                    | 3.0                             |           |
| Post-Use Cigarette Filters              |                                                                                     |          |             |      |                |        |          | 76 <sup>c</sup>            | 46.3             | 6.6                    | 3.0                             |           |

<sup>a</sup> Determined by GC.

<sup>b</sup> Determined by <sup>1</sup>H NMR.

<sup>c</sup> Isolated Yield.

<sup>d</sup> Calculated on the Lewis Base species.

## S2 Char functionalization yields for every step

**Table S2** Four-step functionalization yield for every material tested

| Reaction Step                         | Starting Material |      |      |     |      |      |
|---------------------------------------|-------------------|------|------|-----|------|------|
|                                       | FSD               | PC   | SBPB | PS  | PUCF | CA   |
| 1 – Pyrolysis (%)                     | 20                | 15.5 | 13   | 14  | 15   | 14.5 |
| 2 – Oxidation (%)                     | 65                | 61   | 70   | 62  | 64   | 61   |
| 3 – Amination (%) <sup>a</sup>        | 130               | 125  | 135  | 124 | 131  | 126  |
| 4 – Quaternarization (%) <sup>a</sup> | 113               | 108  | 112  | 109 | 115  | 110  |

<sup>a</sup> Yields of step 3 and 4 are higher than 100% due to addition of functional groups (APTES for step 3 and Mel for step 4) that increase char weight.

**S3** Elemental analysis of the functionalized chars over different reaction conditions and their application in the synthesis of SC

**Table S3a** Elemental analysis of the functionalized chars from fir sawdust (FSD) over different reaction conditions (*mean wt% ± standard deviation of three independent replicates*)

| Catalyst | Conditions                                                                                                                                                                     | N (%)       | C (%)      | H (%)     |
|----------|--------------------------------------------------------------------------------------------------------------------------------------------------------------------------------|-------------|------------|-----------|
| <b>A</b> | <b>1)</b> 420 °C, 15h; <b>2)</b> HNO <sub>3</sub> , 85°C, 48h;<br><b>3)</b> WET, APTES, EtOH, 80°C reflux, 24h;<br><b>4)</b> MeI, EtOH 40°C, 16h                               | 5.9 ± 0.1   | 34.7 ± 0.3 | 4.4 ± 0.2 |
| <b>B</b> | <b>1)</b> 420 °C, 15h; <b>2)</b> H <sub>2</sub> SO <sub>4</sub> , KMnO <sub>4</sub> , 85 °C, 24h; <b>3)</b> WET, APTES, EtOH, 80°C reflux, 24h; <b>4)</b> MeI, EtOH 40°C, 16h  | 0.4 ± 0.1   | 63.5 ± 0.4 | 2.6 ± 0.1 |
| <b>C</b> | <b>1)</b> 420 °C, 15h; <b>2)</b> HNO <sub>3</sub> /H <sub>2</sub> SO <sub>4</sub> (1:3), 85°C, 6h; <b>3)</b> WET, APTES, EtOH, 80°C reflux, 24h; <b>4)</b> MeI, EtOH 40°C, 16h | 4.3 ± 0.2   | 51.8 ± 0.5 | 3.8 ± 0.2 |
| <b>D</b> | <b>1)</b> 550 °C, 15h; <b>2)</b> H <sub>2</sub> O <sub>2</sub> , 85 °C, 24h; <b>3)</b> APTES, EtOH:H <sub>2</sub> O (96/4), 80°C <b>4)</b> MeI, EtOH 40°C, 16h                 | 0.6 ± 0.2   | 81.8 ± 0.6 | 1.4 ± 0.1 |
| <b>E</b> | <b>1)</b> 420 °C, 15h; <b>2)</b> H <sub>2</sub> O <sub>2</sub> , 85 °C, 24h; <b>3)</b> APTES, EtOH (no H <sub>2</sub> O), 80°C; <b>4)</b> MeI, EtOH 40°C, 16h                  | 3.1 ± 0.1   | 36.0 ± 0.4 | 4.7 ± 0.1 |
| <b>F</b> | <b>1)</b> 420 °C, 15h; <b>2)</b> H <sub>2</sub> O <sub>2</sub> , 85 °C, 24h; <b>3)</b> APTES, EtOH:H <sub>2</sub> O (90/10), 80°C; <b>4)</b> MeI, EtOH 40°C, 16h               | 5.6 ± 0.1   | 31.9 ± 0.6 | 4.3 ± 0.2 |
| <b>G</b> | <b>1)</b> 420 °C, 15h;<br><b>2)</b> APTES, EtOH:H <sub>2</sub> O (96/4), 80°C                                                                                                  | 0.08 ± 0.05 | 75.7 ± 0.2 | 2.5 ± 0.2 |
| <b>H</b> | <b>1)</b> 420 °C, 15h;<br><b>2)</b> APTES, EtOH:H <sub>2</sub> O (96/4), 80°C<br><b>3)</b> MeI, EtOH 40°C, 16h                                                                 | 0.05 ± 0.03 | 74.9 ± 0.2 | 2.7 ± 0.1 |

**Table S3b** Results for carbonation reaction using catalyst obtained from fir sawdust (FSD) produced over different conditions (Table S.3a)

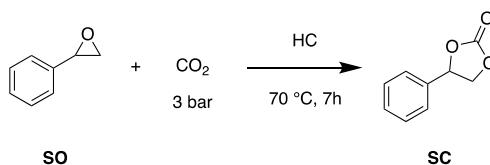

| Entry                | Catalyst | SC [%] <sup>b,c</sup> |
|----------------------|----------|-----------------------|
| <b>1<sup>a</sup></b> | <b>A</b> | 86                    |
| <b>2</b>             | <b>B</b> | 0                     |
| <b>3</b>             | <b>C</b> | 71                    |
| <b>4</b>             | <b>D</b> | 0                     |
| <b>5</b>             | <b>E</b> | 21                    |
| <b>6</b>             | <b>F</b> | 14                    |
| <b>7</b>             | <b>H</b> | 0                     |

<sup>a</sup> Reaction conditions: 0.875 mmol SO (100 μL), HC (10% w/w), autoclave.

<sup>b</sup> Isolated Yields are given, after purification of the reaction crude by flash column chromatography. Yield of SC was the average after two runs.

<sup>c</sup> Selectivity was >99% for all entries. It was determined by <sup>1</sup>H NMR spectroscopy using mesitylene as internal standard.

- Oxidation step is of fundamental importance to efficiently anchor -NH<sub>2</sub> functionalities and produce an active catalyst (Table S3a, entry G).

- Hydrolytic condensation of APTES was also conducted, using third step optimized conditions (APTES, EtOH:H<sub>2</sub>O (96/4), 80°C) without the presence of the char: no polymeric solid from APTES self-condensation was obtained, resulting in a clear transparent solution.

**S4** Elemental analysis of the char functionalized with Bul and OctI over different conditions (Table S4a) and their application in the synthesis of SC (Table S4b)

**Table S4a** Elemental analysis of the optimization of reaction conditions for Bul and OctI anchoring

| Label    | Conditions           | N (wt%)   | C (wt%)    | H (wt%)   |
|----------|----------------------|-----------|------------|-----------|
| <b>G</b> | Bul, EtOH 40°C, 16H  | 6.3 ± 0.2 | 39.6 ± 0.3 | 5.2 ± 0.2 |
| <b>H</b> | OctI, EtOH 40°C, 16H | 6.3 ± 0.1 | 40.3 ± 0.2 | 5.3 ± 0.2 |
| <b>I</b> | Bul, 80°C, 16H       | 5.2 ± 0.1 | 33.0 ± 0.4 | 4.5 ± 0.1 |
| <b>J</b> | OctI, 80°C, 16H      | 5.4 ± 0.2 | 36.3 ± 0.3 | 4.9 ± 0.2 |
| <b>K</b> | Bul, 120°C, 16H      | 4.7 ± 0.1 | 34.2 ± 0.2 | 4.7 ± 0.1 |
| <b>L</b> | OctI, 120°C, 16H     | 4.9 ± 0.1 | 41.2 ± 0.5 | 5.4 ± 0.2 |

**Table S4b** Results for carbonation reaction using Bul and OctI functionalized catalysts

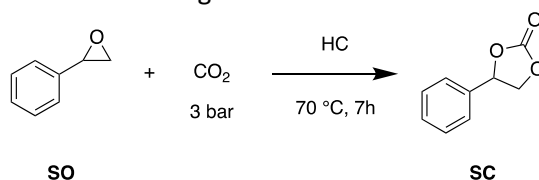

| Entry <sup>a</sup> | Catalyst | SC [%] <sup>b,c</sup> |
|--------------------|----------|-----------------------|
| <b>1</b>           | <b>G</b> | 26                    |
| <b>2</b>           | <b>H</b> | 15                    |
| <b>3</b>           | <b>I</b> | 65                    |
| <b>4</b>           | <b>J</b> | 61                    |
| <b>5</b>           | <b>K</b> | 79                    |
| <b>6</b>           | <b>L</b> | 84                    |

<sup>a</sup> Reaction conditions: 0.875 mmol SO (100 μL), HC (10% w/w), autoclave.

<sup>b</sup> Isolated Yields are given, after purification of the reaction crude by flash column chromatography. Yield of SC was the average after two runs.

<sup>c</sup> Selectivity was >99% for all entries. It was determined by <sup>1</sup>H NMR spectroscopy using mesitylene as internal standard.

**S5** Elemental analysis of the cellulose functionalized avoiding pyrolysis and oxidation steps (Table S5a) and their application in the synthesis of SC (Table S5b)

**Table S5a** Elemental analysis of the optimization of reaction conditions for cellulose functionalization avoiding step 1 and 2 (*mean wt% ± standard deviation of three independent replicates*)

| Label    | Conditions                                                                                     | N (%)      | C (%)      | H (%)     |
|----------|------------------------------------------------------------------------------------------------|------------|------------|-----------|
| <b>M</b> | <b>1)</b> APTES (4.4%), EtOH:H <sub>2</sub> O (96/4), 80°C; 4h; <b>2)</b> MeI, EtOH 40°C, 16h  | 0.2 ± 0.05 | 38 ± 0.2   | 5.8 ± 0.1 |
| <b>N</b> | <b>1)</b> APTES (35%), EtOH:H <sub>2</sub> O (96/4), 120°C; 24h; <b>2)</b> MeI, EtOH 40°C, 16h | 2.1 ± 0.1  | 32.3 ± 0.3 | 5.4 ± 0.1 |
| <b>O</b> | <b>1)</b> APTES:H <sub>2</sub> O (1/1), 140°C; 24h; <b>2)</b> MeI, EtOH 40°C, 16h              | 3.75 ± 0.1 | 24.4 ± 0.2 | 5.3 ± 0.1 |

**Table S5b** Results for carbonation reaction using cellulose functionalized catalysts avoiding step 1 and 2

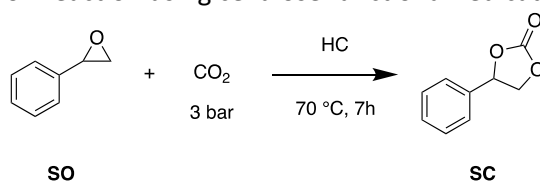

| Entry <sup>a</sup> | Catalyst | SC [%] <sup>b,c</sup> |
|--------------------|----------|-----------------------|
| <b>1</b>           | <b>M</b> | 0                     |
| <b>2</b>           | <b>N</b> | 40                    |
| <b>3</b>           | <b>O</b> | 79                    |

<sup>a</sup> Reaction conditions: 0.875 mmol SO (100 μL), HC (10% w/w), autoclave.

<sup>b</sup> Isolated Yields are given, after purification of the reaction crude by flash column chromatography. Yield of SC was the average after two runs.

<sup>c</sup> Selectivity was >99% for all entries. It was determined by <sup>1</sup>H NMR spectroscopy using mesitylene as internal standard.

## S6 Weight of HC-FSD, HC-PC and HC-CA after each reaction cycle

**Table S6** Weight of HC-FSD, HC-PC and HC-CA after each reaction cycle

|                  | HC-FSD      |               | HC-PC       |               | HC-CA       |               |
|------------------|-------------|---------------|-------------|---------------|-------------|---------------|
|                  | Weight [mg] | Variation [%] | Weight [mg] | Variation [%] | Weight [mg] | Variation [%] |
| <b>I cycle</b>   | 10.5        | -             | 10.5        | -             | 10.5        | -             |
| <b>II cycle</b>  | 14.1        | 141           | 12.2        | 122           | 14.4        | 144           |
| <b>III cycle</b> | 13.7        | 137           | 13.1        | 131           | 14          | 140           |
| <b>IV cycle</b>  | 13.3        | 133           | 12.9        | 129           | 14.2        | 142           |
| <b>V cycle</b>   | 13.2        | 132           | 13.3        | 133           | 12.8        | 128           |

## S7 Recycling catalytic test for HC-FSD with 5 wt% of catalyst loading

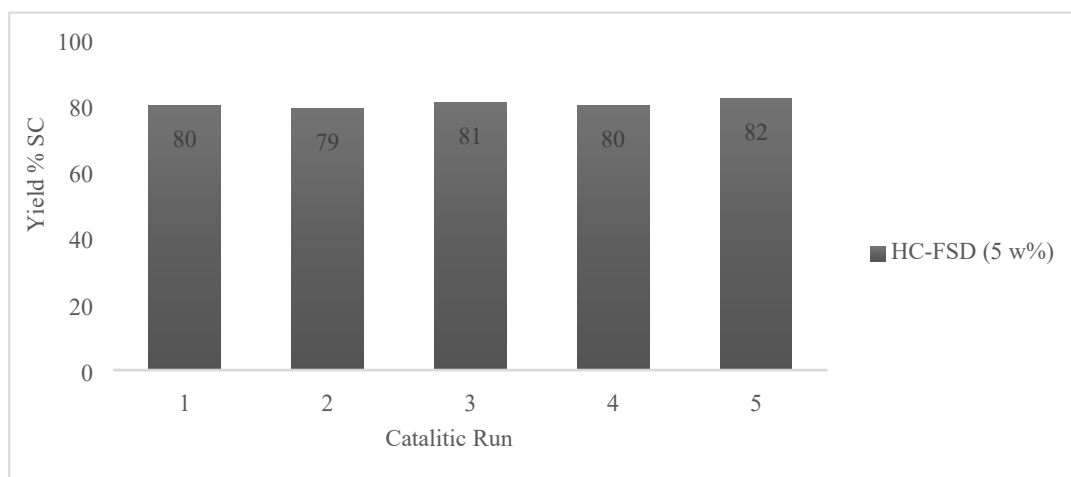

## S8 Elemental composition of the final catalysts HC-FSD after 5 cycles

**Table S8** Elemental composition of the final catalysts HC-FSD after 5 cycles (mean wt%  $\pm$  standard deviation of three independent replicates)

| Starting Material | catalyst   | N (%)         | C (%)          | H (%)         |
|-------------------|------------|---------------|----------------|---------------|
| Fir Sawdust       | HC-FSD-5Cy | 4.0 $\pm$ 0.1 | 48.3 $\pm$ 0.4 | 4.9 $\pm$ 0.1 |



## S9 Raman characterization

Fig. S5 shows the comparison of the Raman spectra of the six catalysts obtained from the different starting materials. While the spectra of cellulose HC-C and cellulose acetate HC-CA display no peaks (spectra are dominated by a strong structure less luminescent background), those of the catalysts potato starch HC-PS, starch-based plastic bag HC-SBPB and post-use cigarette filters HC-PUCF show G and D bands at around  $1600\text{ cm}^{-1}$  and  $1370\text{ cm}^{-1}$ , respectively, related to the in-plane C-C vibrations of  $\text{sp}^2$ -bonded carbon atoms in graphitic-like structures and to the out-of-plane C-C vibrations due to structural defects in the graphitic structure.<sup>12,13,14</sup>

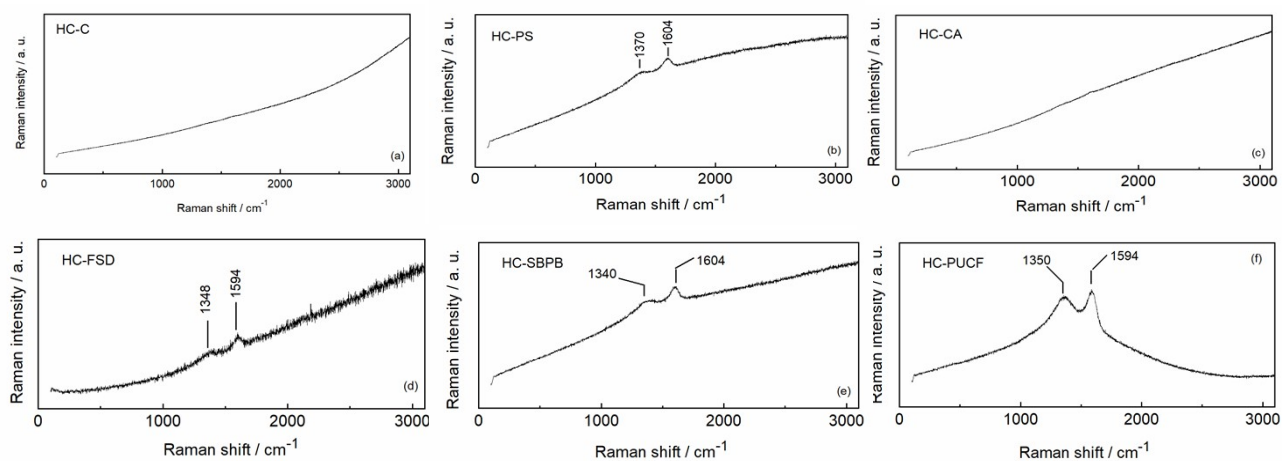

**Fig. S9** Comparison of the Raman spectra of the six catalysts obtained from different starting materials ( $\lambda_{\text{exc}} = 488\text{ nm}$ ): (a) pristine cellulose HC-PC; (b) potato starch HC-PS; (c) cellulose acetate HC-CA; (d) fir sawdust HC-FSD; (e) starch-based plastic bag HC-SBPB; (f) post-use cigarette filters HC-PUCF.

**S10** ATR-FTIR characterization of the starting materials

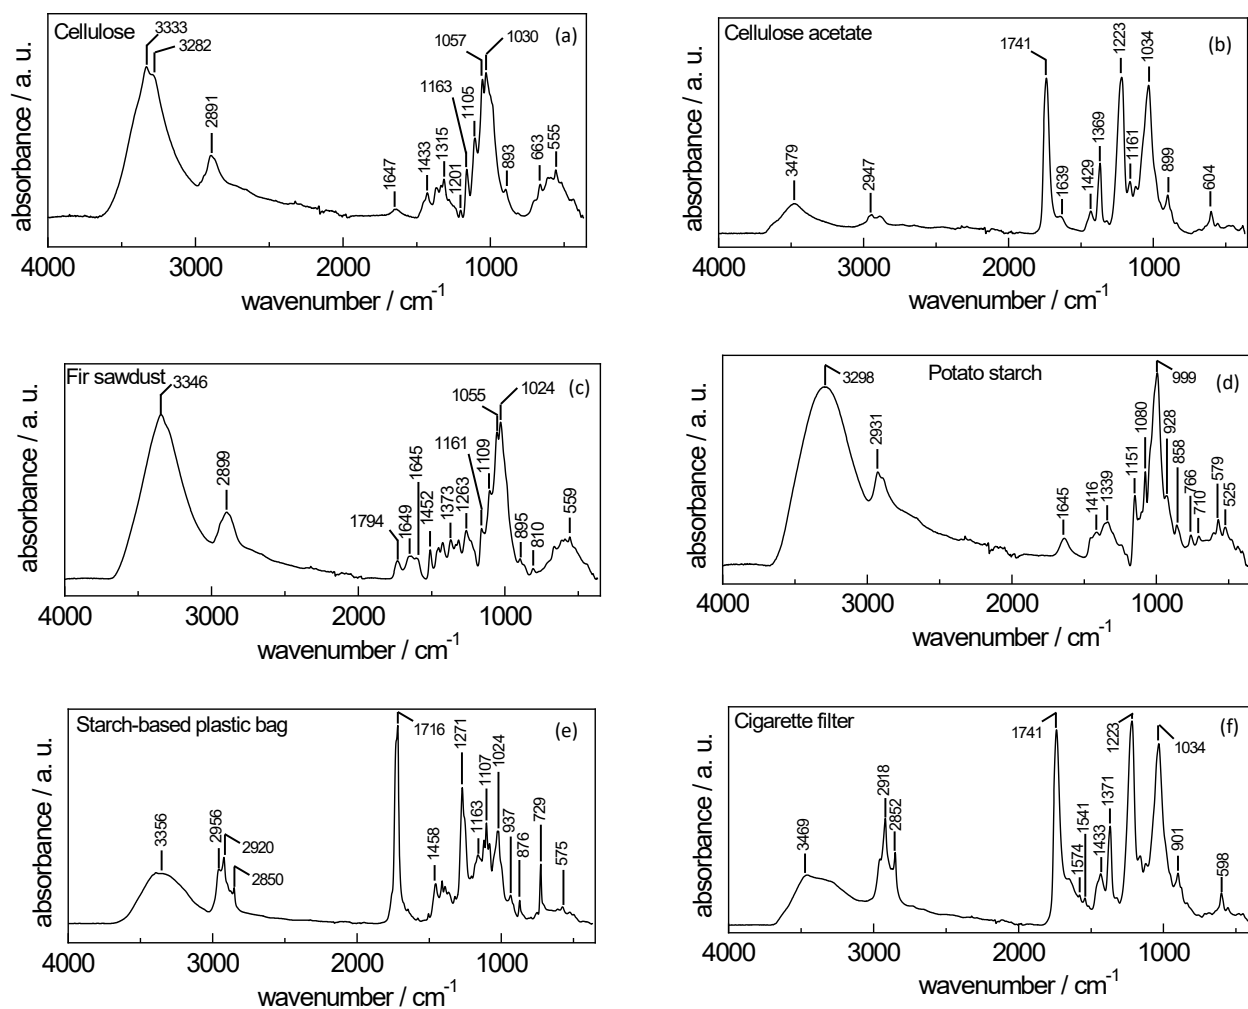

**Fig. S10** ATR-FTIR spectra of catalyst precursors: (a) pristine cellulose; (b) cellulose acetate; (c) fir sawdust; (d) potato starch; (e) starch-based plastic bag; (f) post-use cigarette filter.

## S11 Morphological characterization

The six catalysts, i.e. HC-based samples obtained from different starting materials, were imaged by Scanning Electron Microscopy (SEM) for understanding if the catalyst morphology could affect the yield of CO<sub>2</sub> conversion in the cyclic carbonate reaction. Catalysts images collected at low magnification (x 80) (Fig. S11) suggest three archetypical morphologies: small-medium aggregates with crystal-like shape (a, b, c), big aggregates with crystal-like shape (d, e, f) and big aggregates with no regular shape (g). By comparing SEM images to yield results, no straightforward correlation is observed amongst them.

This finding is also confirmed by comparing images collected at higher magnifications (x 700 and x 2.5k) (Fig. S11'). By inspecting morphologies at x 700, crystal-like aggregates are smaller in HC-CA (S11'a) rather than HC-SBPB (S11'b), with no significant morphological differences even at the highest magnification (i.e. x 2.5k, S11'c and S11'd).

Figure S11'' compares SEM images collected at x 2.5k for post-use cigarette filters HC-PUCF (S11''a) and fir sawdust HC-FSD (S11''b). The catalyst HC-PS has a more compact surface respect to HC-PUCF one. Such a compact surface of HC-FSD is partly maintained also in recycled HC-FSD after five recycling runs (S11''c).

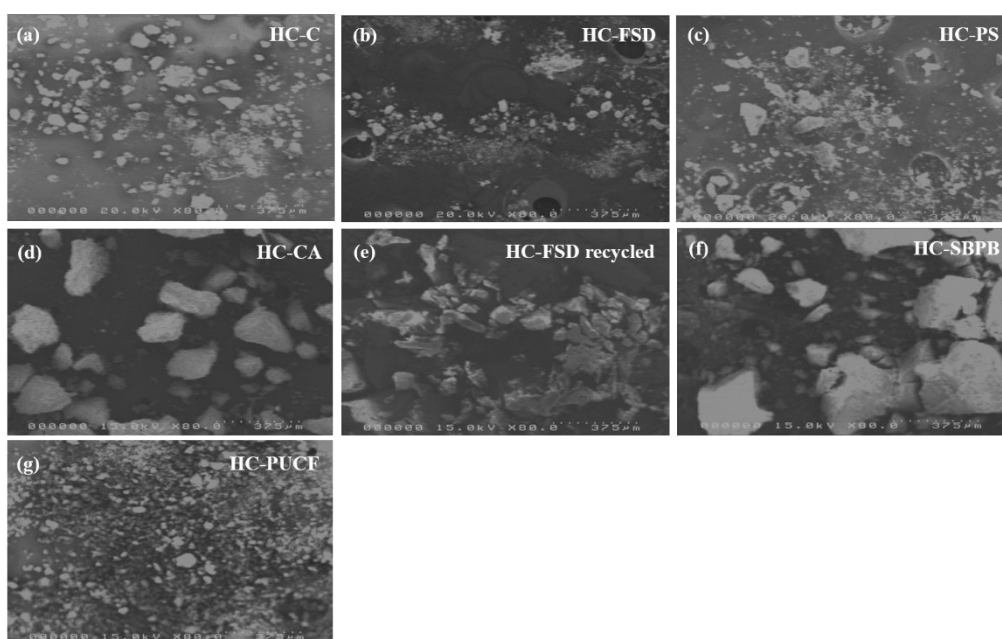

**Fig. S11** SEM images (x 80) of the catalysts: (a) cellulose HC-C; (b) fir sawdust HC-FSD; (c) potato starch HC-PS; (d) cellulose acetate HC-CA; (e) fir sawdust HC-FSD recycled after five recycling runs; (f) starch-based plastic bag HC-SBPB; (g) post-use cigarette filters HC-PUCF.

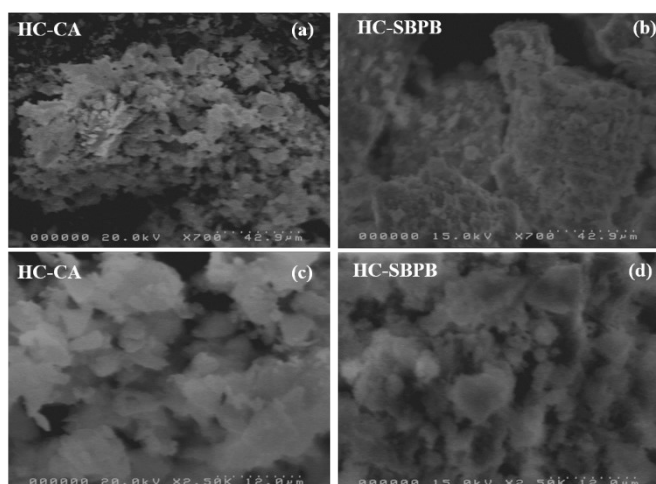

**Fig. S11'** SEM images of the catalysts (a, c) cellulose acetate HC-CA and (b, d) starch-based plastic bag HC-SBPB at different magnifications: (a, b) x 700 and (c, d) x 2.5k.

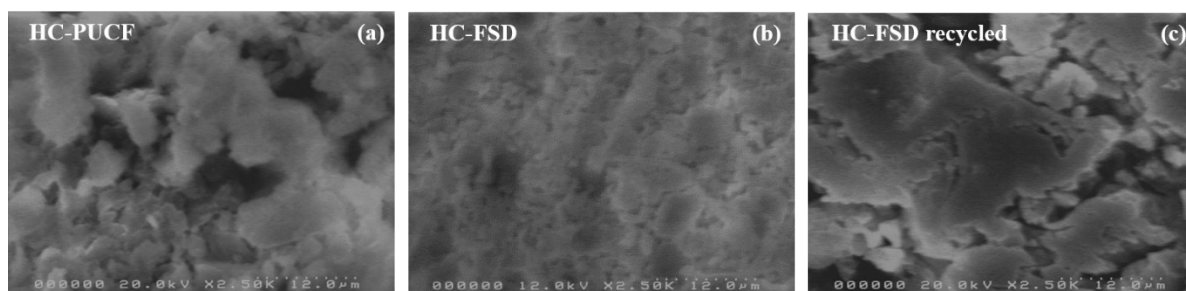

**Fig. S11''** SEM images at x 2.5k of the catalysts (a) post-use cigarette filters HC-PUCF, (b) fir sawdust HC-FSD and (c) fir sawdust HC-FSD recycled after five recycling runs.

**S12** Band assignment of the ATR-FTIR spectra of pristine cellulose- and sawdust-derived samples shown in Fig. 2a-d.<sup>15-</sup>

| Band position (cm <sup>-1</sup> ) | Assignment                                                                           |
|-----------------------------------|--------------------------------------------------------------------------------------|
| 1698                              | Stretching of conjugate C=O within the ring of polyaromatic systems                  |
| 1584                              | Skeletal vibrations involving C-C stretching within the ring of polyaromatic systems |
| 1169                              | C-O stretch of phenols                                                               |
| 875 - 750                         | Out-of-plane ("oop") bending of C-H bond of polycyclic aromatic hydrocarbon systems  |
| 1710                              | C=O stretching of carboxy groups                                                     |
| 1375                              | In-plane O-H bending of phenol OH groups                                             |
| 1215                              | C-O stretching of phenol OH groups                                                   |
| 3500 - 2500                       | O-H stretching of the phenol OH and Si-OH groups; N-H stretching vibrations          |
| 1110/1040                         | C-N stretching of primary amines; Si-O-C (aliphatic), Si-O stretching vibrations     |
| 920                               | Si-OH stretch                                                                        |
| 460                               | Si-O rocking vibrations                                                              |
| 3390                              | N-H stretching vibrations of ammonium salt                                           |

**S13**  $^1\text{H}$  and  $^{13}\text{C}$  NMR spectra of isolated **PRODUCT 2a** (Table 6, entry 1).

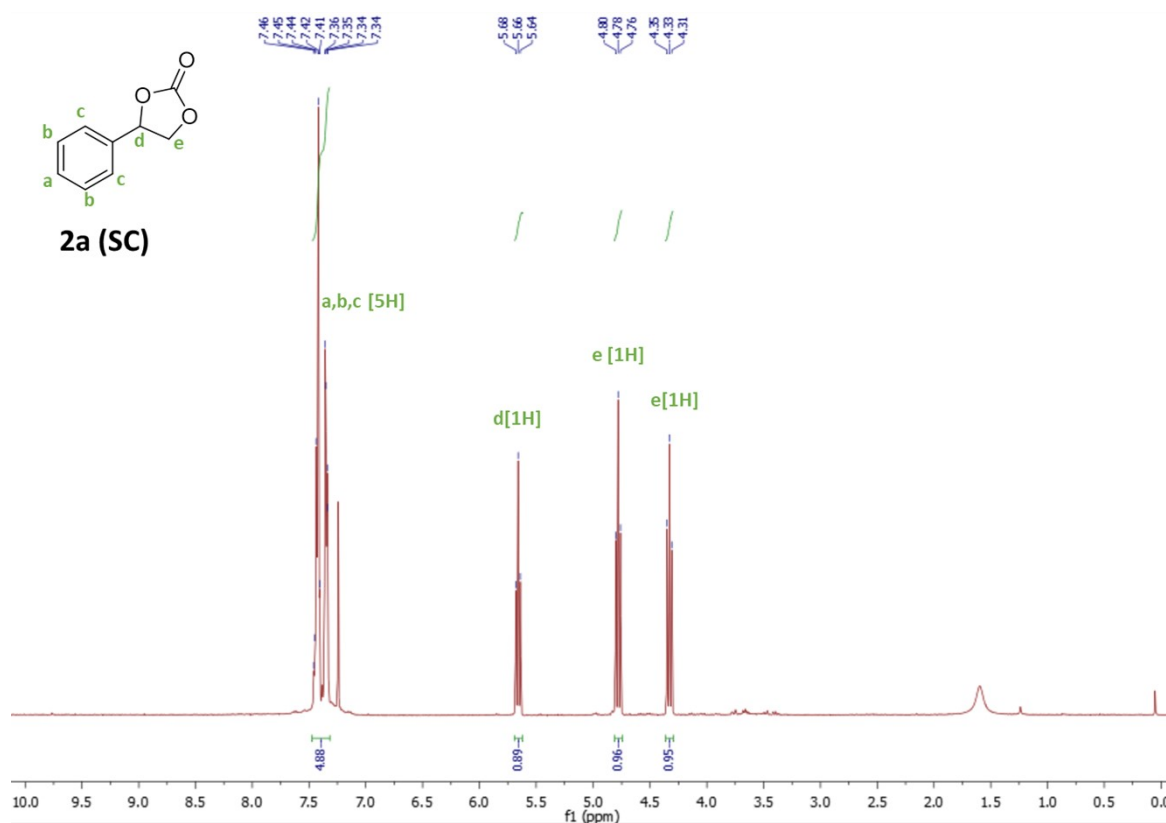

**2a.**  $^1\text{H}$  NMR (400 MHz,  $\text{CDCl}_3$ )  $\delta$  7.46–7.34 (m, 5H), 5.66 (t,  $J = 8.0$  Hz, 1H), 4.78 (t,  $J = 8.4$  Hz, 1H), 4.33 (dd,  $J = 8.5, 8.0$  Hz, 1H).

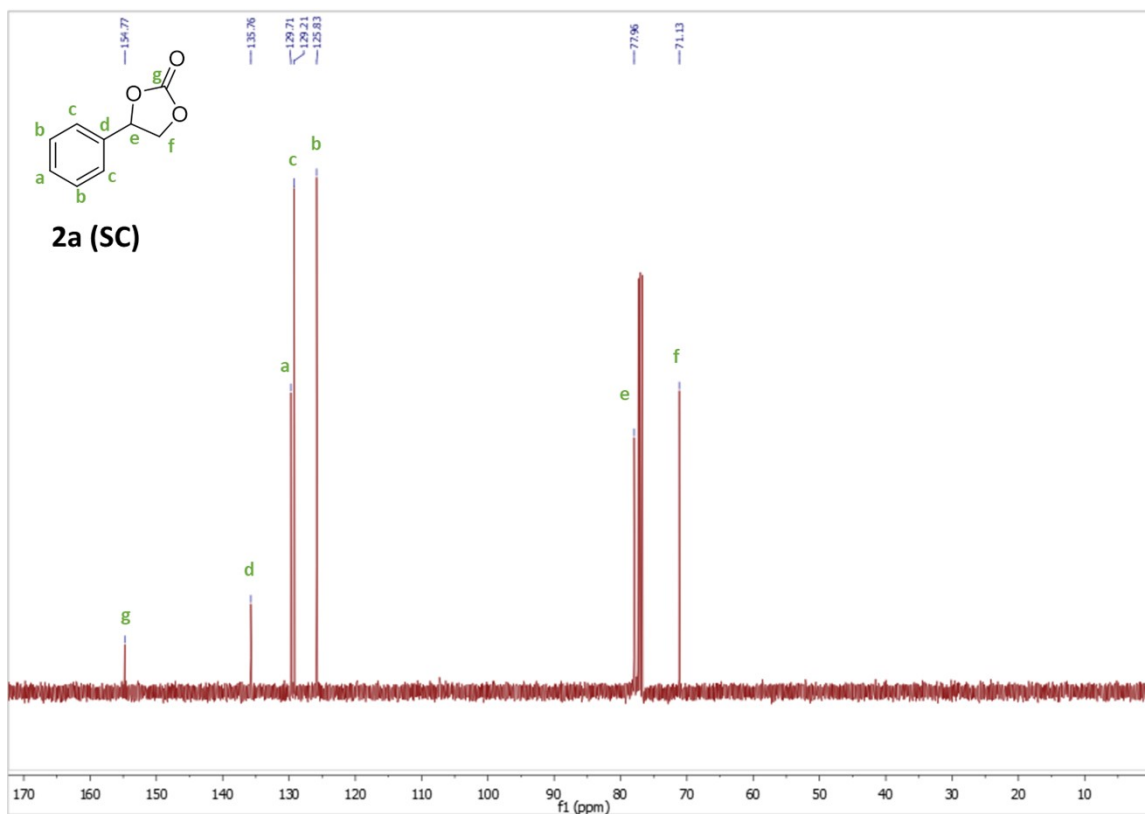

**2a.**  $^{13}\text{C}$  NMR (100 MHz,  $\text{CDCl}_3$ )  $\delta$  154.77, 135.76, 129.71, 129.21, 125.83, 77.96, 71.13

S14  $^1\text{H}$  and  $^{13}\text{C}$  NMR spectra of isolated **PRODUCT 2b** (Table 6, entry 2).

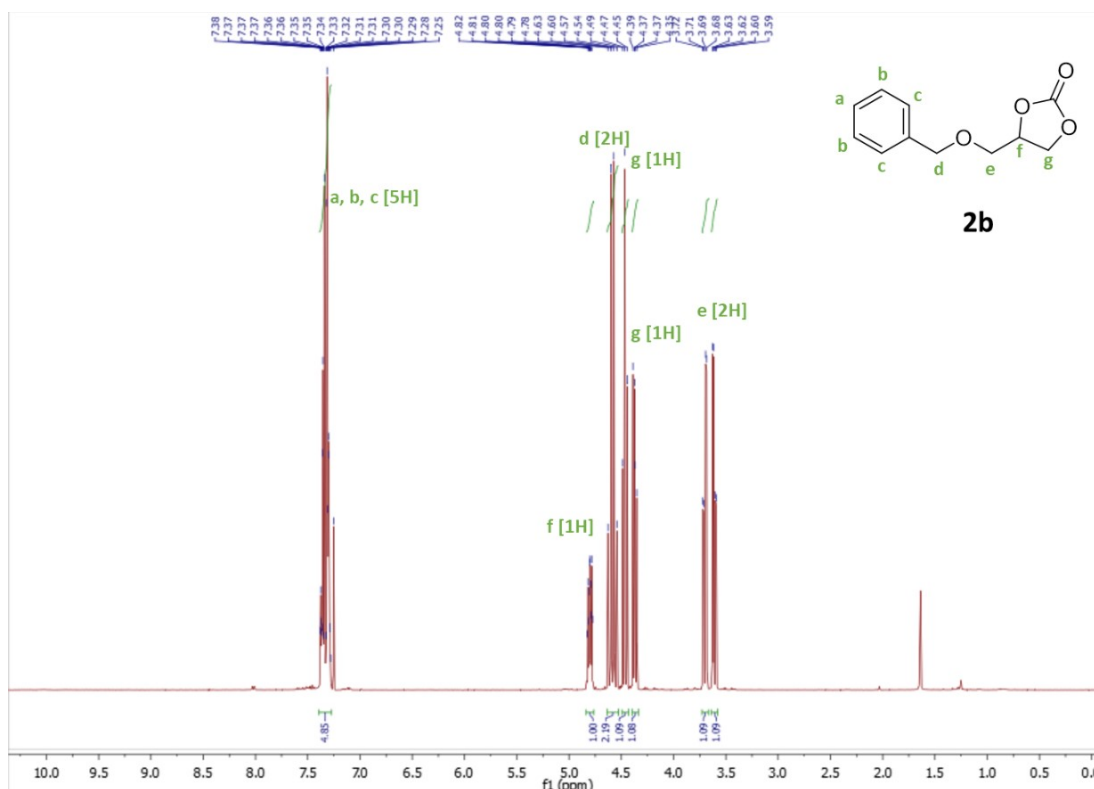

**2b.**  $^1\text{H}$  NMR (400 MHz,  $\text{CDCl}_3$ )  $\delta$  7.38 – 7.25 (m, 5H), 4.879 (ddt,  $J = 7.9, 6.1, 3.9$  Hz, 1H), 4.60 (m, 2H), 4.49 (t,  $J = 8.4$  Hz, 1H), 4.37 (dd,  $J = 8.4, 6.1$  Hz, 1H), 3.70 (dd,  $J = 10.9, 4.0$  Hz, 1H), 3.61 (dd,  $J = 10.9, 3.8$  Hz, 1H).  
 Impurities signals:  $\text{H}_2\text{O}$  (1.56, s).

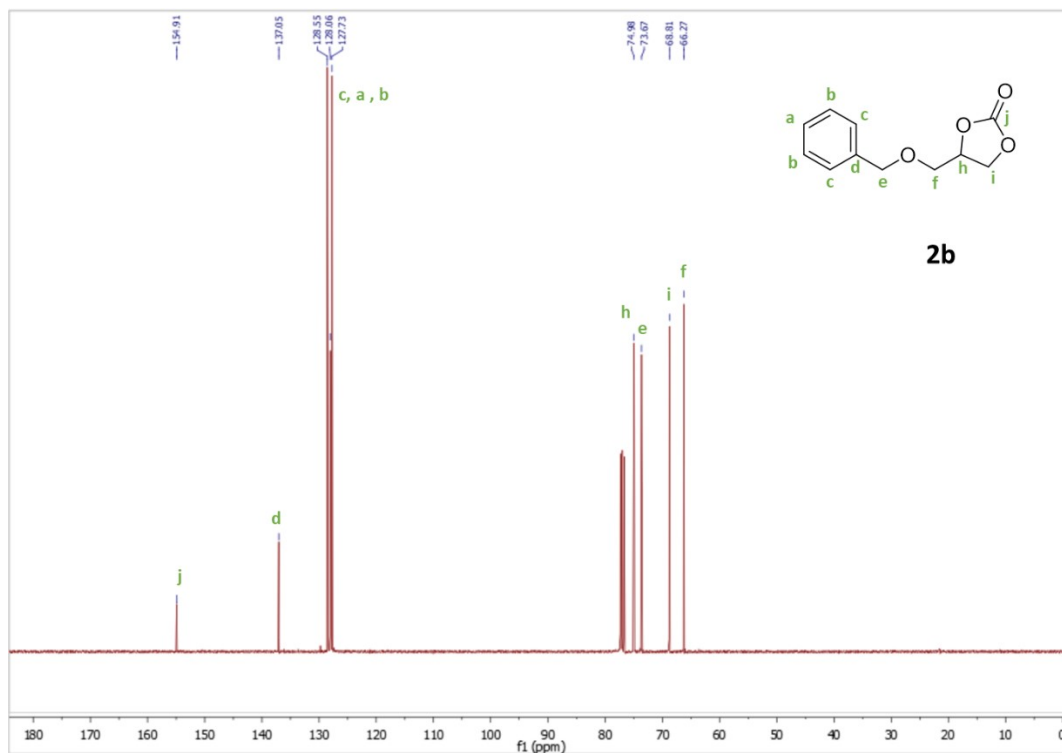

**2b.**  $^{13}\text{C}$  NMR (100 MHz,  $\text{CDCl}_3$ )  $\delta$  154.91, 137.05, 128.55, 128.06, 127.73, 74.98, 73.67, 68.81, 66.27.

S15  $^1\text{H}$  and  $^{13}\text{C}$  NMR spectra of isolated **PRODUCT 2c** (Table 6, entry 3).

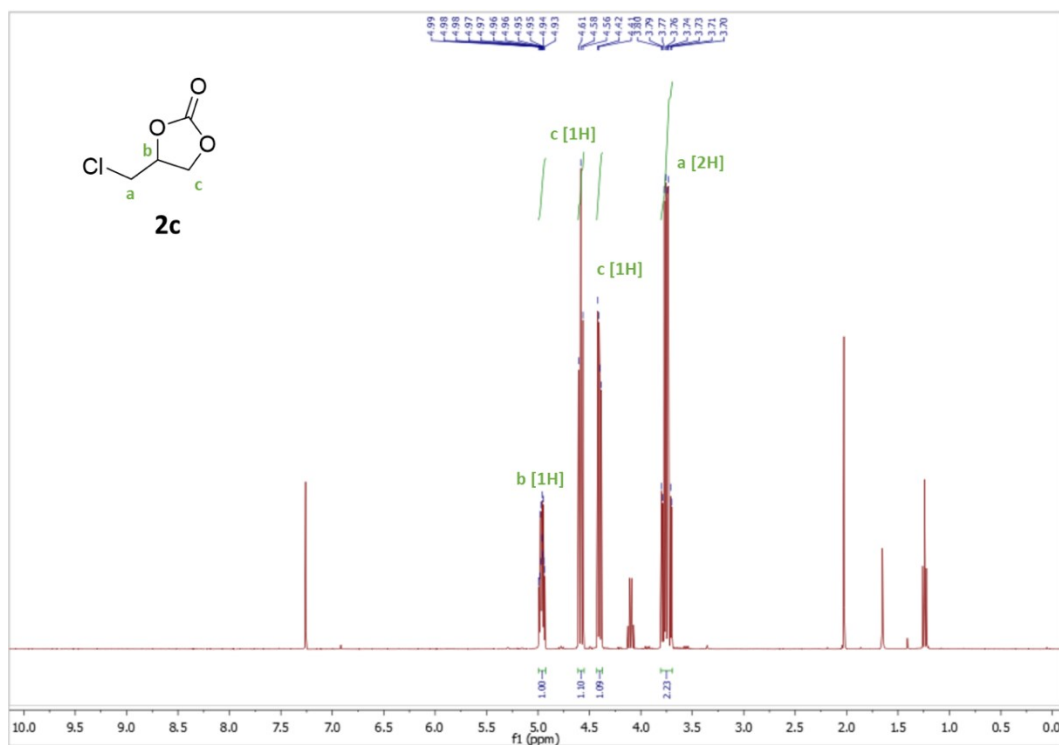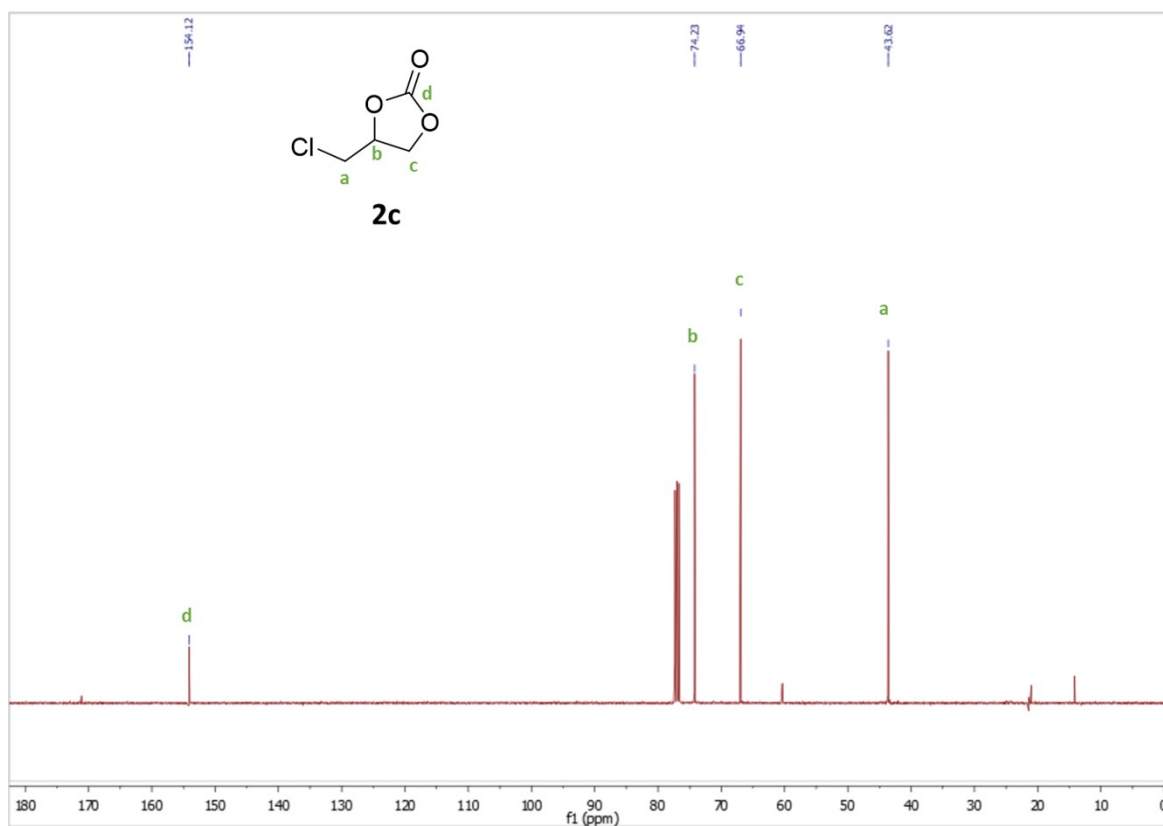

S16  $^1\text{H}$  and  $^{13}\text{C}$  NMR spectra of isolated **PRODUCT 2d** (Table 6, entry 4).

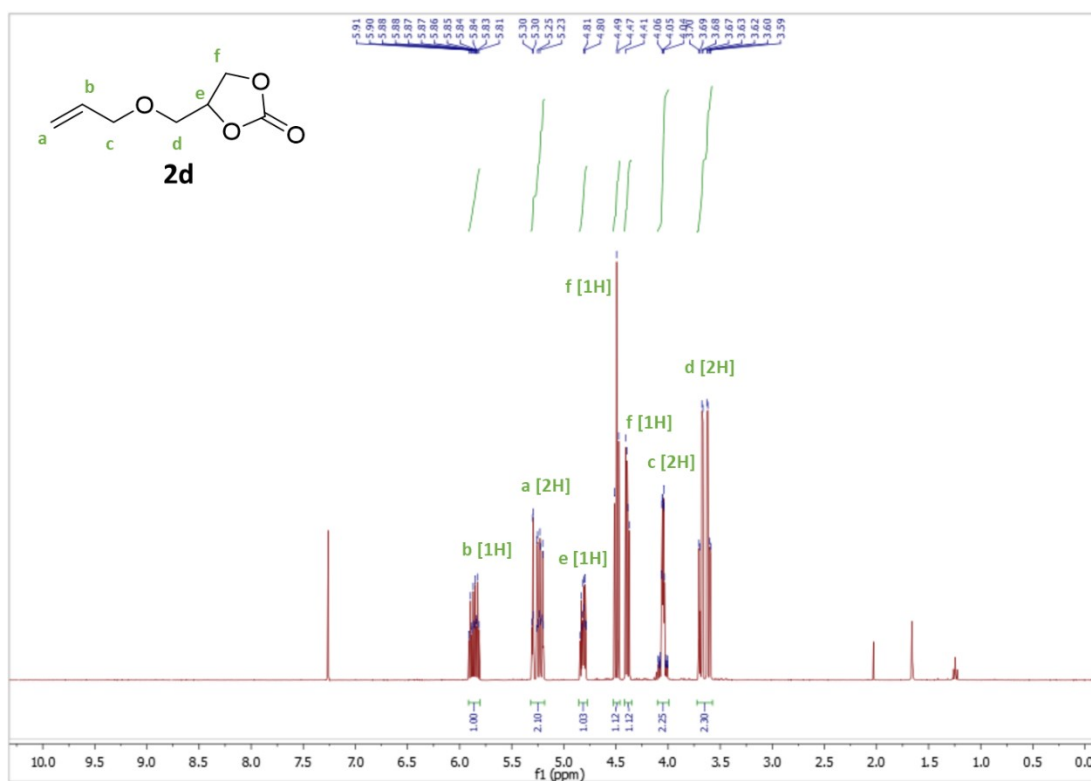

**2d.**  $^1\text{H}$  NMR (400 MHz,  $\text{CDCl}_3$ )  $\delta$  5.86 (ddd,  $J = 22.8, 10.8, 5.6$  Hz, 1H), 5.30-5.23 (m, 2H), 4.8 (ddt,  $J = 8.1, 6.1, 3.9$  Hz, 1H), 4.48 (t,  $J = 8.4$  Hz, 1H), 4.41 (dd,  $J = 8.3, 6.1$  Hz, 1H), 4.05 (m, 2H), 3.70-3.59 (m, 2H). Impurities signals:  $\text{H}_2\text{O}$  (1.56, s); AcOEt (2.05, s; 4.12, q; 1.26, t)

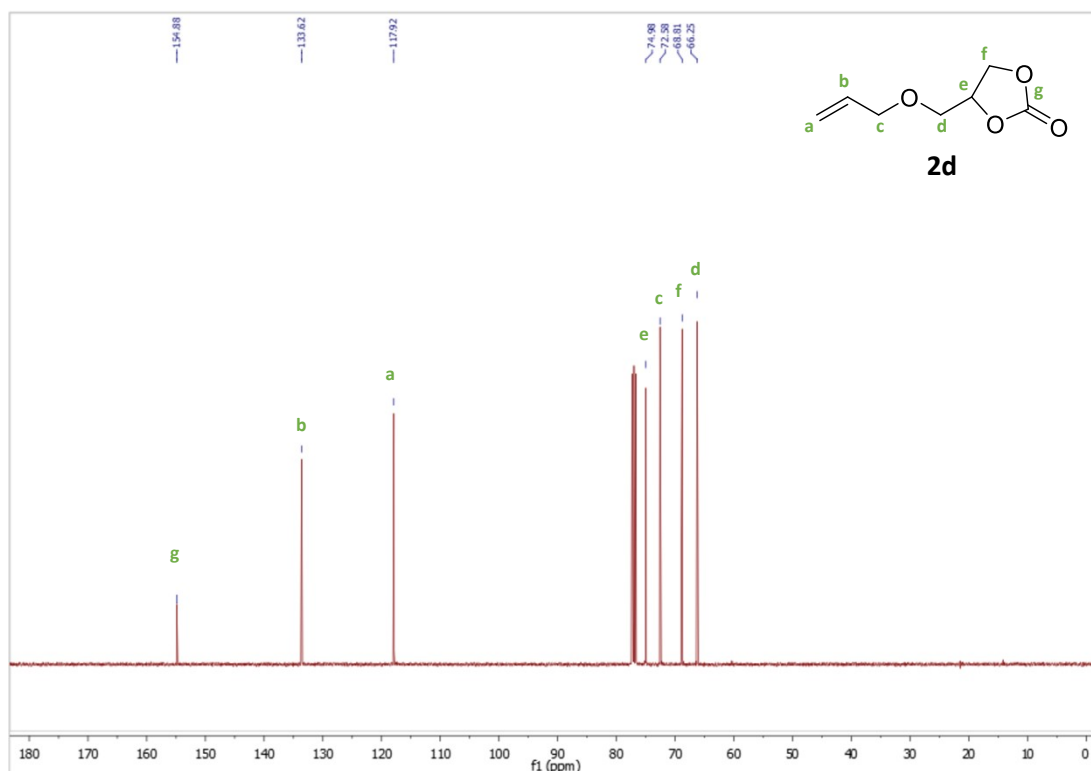

**2d.**  $^{13}\text{C}$  NMR (100 MHz,  $\text{CDCl}_3$ )  $\delta$  154.88, 133.62, 117.92, 74.98, 72.58, 68.81, 66.25.



S17 <sup>1</sup>H and <sup>13</sup>C NMR spectra of isolated **PRODUCT 2e** (Table 6, entry 5).

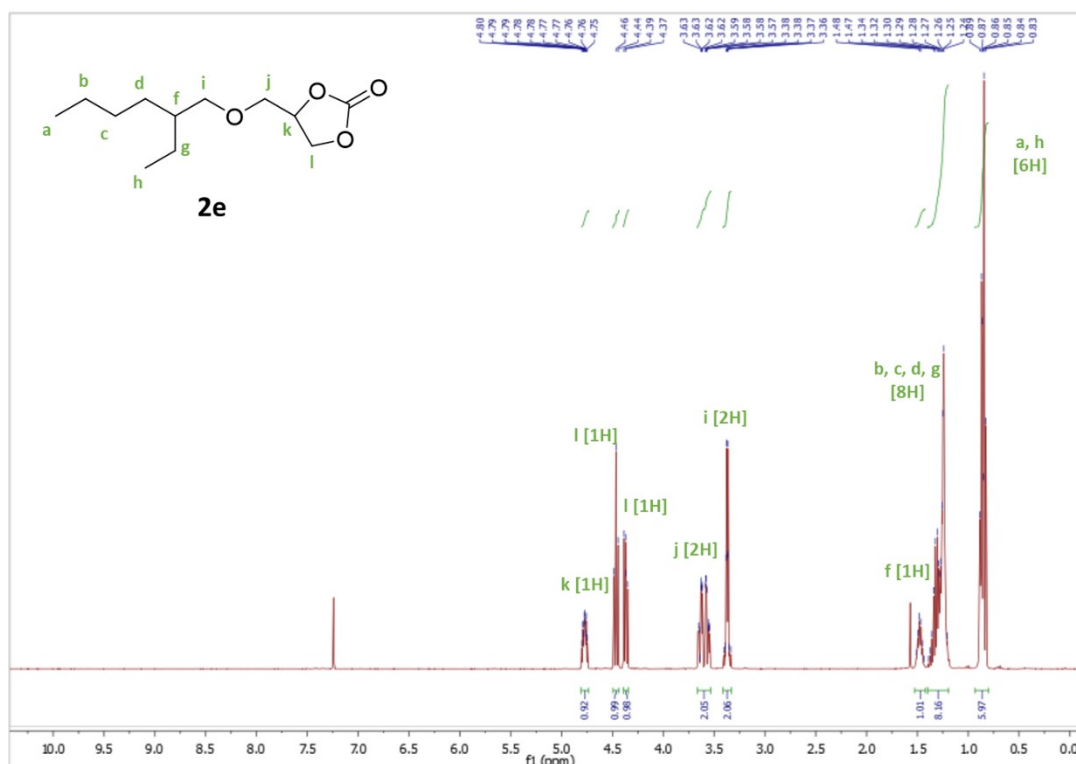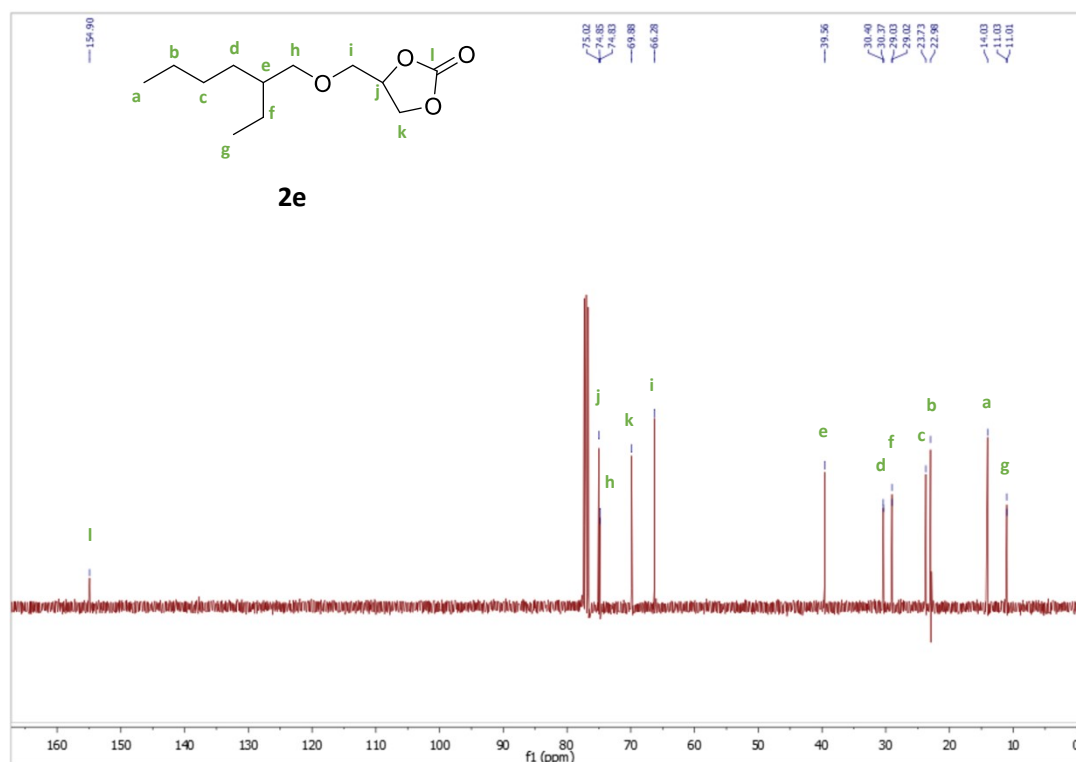

**2e.** <sup>13</sup>C NMR (100 MHz, CDCl<sub>3</sub>) δ 154.90, 75.02, 74.84, 69.88, 66.28, 39.56, 30.40, 29.03, 23.73, 22.98, 14.03, 11.02.

## S18 XPS quantitative analysis and BE value of the HCs

**Table S18a.** XPS quantitative analysis and BE value of the sample HC-FSD.

| Name    | Peak BE | FWHM eV | Area (P) CPS.eV | Atomic % | Assignment     |
|---------|---------|---------|-----------------|----------|----------------|
| C1s - 1 | 285.0   | 1.68    | 14274.1         | 21.6     | C - C          |
| C1s - 2 | 286.8   | 1.68    | 11544.59        | 17.5     | C - O, C - N   |
| C1s - 3 | 287.9   | 1.68    | 5152.27         | 7.8      | C = O          |
| C1s - 4 | 288.7   | 1.68    | 2006.11         | 3.0      | -COOH(R)       |
| I3d5    | 618.5   | 1.61    | 78953.9         | 6.4      | I <sup>-</sup> |
| N1s - 1 | 399.8   | 2.64    | 710.58          | 0.6      | Amine group    |
| N1s - 2 | 402.4   | 2.64    | 7375.71         | 6.4      | Ammonium group |
| O1s - 1 | 532.4   | 1.74    | 34327.09        | 18.8     | C - O, C = O   |
| O1s - 2 | 532.4   | 1.74    | 5686.7          | 3.1      | Silicates      |
| O1s - 3 | 534.5   | 1.74    | 1376.96         | 2.6      | Si - O         |
| Si2p3   | 103.0   | 1.95    | 664.86          | 10.8     | APTES          |

**Table S18b.** XPS quantitative analysis and BE value of the sample HC-FSD (after recycling).

| Name     | Peak BE | FWHM eV | Area (P) CPS.eV | Atomic % | Assignment     |
|----------|---------|---------|-----------------|----------|----------------|
| C1s - 1  | 285.0   | 1.69    | 20053.63        | 54.3     | C - C          |
| C1s - 2  | 286.7   | 1.69    | 5536.75         | 15.0     | C - O, C - N   |
| C1s - 3  | 289.0   | 1.69    | 864.43          | 2.3      | -COOH(R)       |
| I3d5 - 1 | 618.2   | 1.99    | 1237.68         | 0.9      | I <sup>-</sup> |
| N1s - 1  | 399.9   | 2.02    | 1099.69         | 1.7      | Amine group    |
| N1s - 2  | 402.6   | 2.02    | 513.01          | 0.8      | Ammonium group |
| O1s - 1  | 532.2   | 2.24    | 18529.00        | 18.2     | C - O, C = O   |
| O1s - 2  | 533.9   | 2.24    | 2154.29         | 2.1      | silicates      |
| Si2p3    | 102.6   | 1.75    | 1122.57         | 5.4      | APTES          |

**Table S18c.** XPS quantitative analysis and BE value of the sample HC-PS.

| Name      | Peak BE | FWHM eV | Area (P) CPS.eV | Atomic % | Bond               |
|-----------|---------|---------|-----------------|----------|--------------------|
| C1s - 1   | 285.0   | 1.70    | 12850.03        | 21.8     | C - C              |
| C1s - 2   | 286.6   | 1.70    | 10377.10        | 17.6     | C - O, C - N       |
| C1s - 3   | 288.1   | 1.70    | 5205.01         | 8.8      | C = O              |
| C1s - 4   | 289.6   | 1.70    | 1740.05         | 3.0      | -COOH(R)           |
| C1s - 5   | 292.1   | 1.70    | 487.18          | 0.8      | Shake-up satellite |
| I3d5 - 1  | 618.9   | 1.63    | 60850.41        | 5.7      | I <sup>-</sup>     |
| I3d5 - 2  | 620.8   | 1.63    | 6615.38         | 0.6      | I - O              |
| N1s - 1   | 398.8   | 2.87    | 938.52          | 0.9      | Amine group        |
| N1s - 2   | 402.0   | 2.87    | 6826.07         | 6.6      | Ammonium group     |
| O1s - 1   | 532.5   | 1.85    | 30030.93        | 18.5     | C - O, C = O       |
| O1s - 2   | 534.2   | 1.85    | 4921.60         | 3.0      | silicates          |
| O1s - 3   | 531.0   | 1.85    | 3495.40         | 2.2      | Si - O - Si        |
| Si2p3 - 1 | 103.0   | 1.97    | 2576.84         | 7.8      | APTES              |
| Si2p3 - 2 | 105.2   | 1.96    | 895.26          | 2.7      | silicates          |

**Table S18d.** XPS quantitative analysis and BE value of the sample HC-CA.

| Name      | Peak BE | FWHM eV | Area (P) CPS.eV | Atomic % | Bond           |
|-----------|---------|---------|-----------------|----------|----------------|
| C1s – 1   | 285.0   | 1.76    | 6896.08         | 21.9     | C – C          |
| C1s – 2   | 286.5   | 1.76    | 6263.82         | 19.9     | C – O, C – N   |
| C1s – 3   | 288.2   | 1.76    | 2230.39         | 7.1      | C = O          |
| C1s – 4   | 290.1   | 1.76    | 544.44          | 1.7      | -COOH(R)       |
| I3d5 – 1  | 618.8   | 1.68    | 35722.30        | 6.2      | I <sup>-</sup> |
| I3d5 – 2  | 620.7   | 1.68    | 3031.15         | 0.5      | I - O          |
| N1s – 1   | 399.6   | 2.54    | 566.52          | 1.0      | Amine group    |
| N1s – 2   | 402.0   | 2.54    | 3609.76         | 6.5      | Ammonium group |
| O1s – 1   | 532.4   | 1.92    | 17358.01        | 20.0     | C – O, C = O   |
| O1s – 2   | 530.6   | 1.92    | 1049.03         | 1.2      | Si – O – Si    |
| O1s – 3   | 534.1   | 1.92    | 2169.26         | 2.5      | silicates      |
| Si2p3 – 1 | 102.7   | 1.74    | 1551.33         | 8.8      | APTES          |
| Si2p3 – 2 | 104.3   | 1.74    | 437.60          | 2.5      | silicates      |

**Table S18e.** XPS quantitative analysis and BE value of the sample HC-SBPB.

| Name      | Peak BE | FWHM eV | Area (P) CPS.eV | Atomic % | Bond           |
|-----------|---------|---------|-----------------|----------|----------------|
| C1s – 1   | 285.0   | 1.69    | 11813.17        | 22.3     | C – C          |
| C1s – 2   | 286.6   | 1.69    | 10158.85        | 19.2     | C – O, C – N   |
| C1s – 3   | 288.2   | 1.69    | 4500.28         | 8.5      | C = O          |
| C1s – 4   | 289.8   | 1.69    | 1256.19         | 2.4      | -COOH(R)       |
| I3d5 – 1  | 618.8   | 1.67    | 63398.50        | 6.6      | I <sup>-</sup> |
| I3d5 – 2  | 620.7   | 1.67    | 6726.17         | 0.7      | I - O          |
| N1s – 1   | 399.6   | 2.84    | 286.58          | 0.3      | Amine group    |
| N1s – 2   | 402.0   | 2.84    | 6082.69         | 6.6      | Ammonium group |
| O1s – 1   | 532.4   | 1.91    | 27429.85        | 18.8     | C – O, C = O   |
| O1s – 2   | 534.3   | 1.91    | 4643.95         | 3.2      | silicates      |
| O1s – 3   | 530.6   | 1.91    | 1568.21         | 1.1      | Si – O – Si    |
| Si2p3 – 1 | 102.8   | 1.75    | 1983.93         | 6.7      | APTES          |
| Si2p3 – 2 | 104.4   | 1.75    | 1085.04         | 3.7      | silicates      |

**Table S18f.** XPS quantitative analysis and BE value of the sample HC-PUCF

| Name      | Peak BE | FWHM eV | Area (P) CPS.eV | Atomic % | Bond           |
|-----------|---------|---------|-----------------|----------|----------------|
| C1s – 1   | 285.0   | 1.82    | 9037.37         | 25.3     | C – C          |
| C1s – 2   | 286.6   | 1.82    | 6357.14         | 17.8     | C – O, C – N   |
| C1s – 3   | 288.3   | 1.82    | 2308.84         | 6.5      | C = O          |
| C1s – 4   | 289.8   | 1.82    | 599.36          | 1.7      | -COOH(R)       |
| I3d5 – 1  | 618.8   | 1.72    | 41996.72        | 6.4      | I <sup>-</sup> |
| I3d5 – 2  | 620.8   | 1.72    | 4087.63         | 0.6      | I - O          |
| N1s – 1   | 399.6   | 2.68    | 635.57          | 1.0      | Amine group    |
| N1s – 2   | 401.9   | 2.68    | 4322.40         | 6.9      | Ammonium group |
| O1s – 1   | 532.4   | 1.83    | 18374.52        | 18.6     | C – O, C = O   |
| O1s – 2   | 530.8   | 1.83    | 1786.16         | 1.8      | Si – O – Si    |
| O1s – 3   | 534.2   | 1.83    | 2645.43         | 2.7      | silicates      |
| Si2p3 – 1 | 102.7   | 1.85    | 1289.44         | 6.5      | APTES          |
| Si2p3 – 2 | 104.2   | 1.85    | 854.09          | 4.3      | silicates      |

**Table S18g.** XPS quantitative analysis and BE value of the sample HC-PC.

| Name    | Peak BE | FWHM eV | Area (P) CPS.eV | Atomic % | Bond           |
|---------|---------|---------|-----------------|----------|----------------|
| C1s – 1 | 285.0   | 1.74    | 11370.10        | 24.9     | C – C          |
| C1s – 2 | 286.4   | 1.74    | 8443.04         | 18.5     | C – O, C – N   |
| C1s – 3 | 287.9   | 1.74    | 2273.89         | 5.0      | C = O          |
| C1s – 4 | 289.2   | 1.74    | 816.97          | 1.8      | -COOH(R)       |
| I3d5    | 618.8   | 1.64    | 56631.25        | 6.8      | I <sup>-</sup> |
| N1s – 1 | 399.3   | 2.28    | 870.71          | 1.1      | Amine group    |
| N1s – 2 | 401.9   | 2.28    | 5377.63         | 6.7      | Ammonium group |
| O1s     | 532.4   | 2.10    | 30601.19        | 24.3     | C – O, C = O   |
| Si2p    | 103.3   | 2.18    | 4206.96         | 10.9     | APTES          |

**S19** HCs active sites quantification**Table S19.** HCs I<sup>-</sup> active sites (mmol/g)

| Catalyst | I <sup>-</sup> Active site (mmol/g) |
|----------|-------------------------------------|
| HC-FSD   | 2.9                                 |
| HC-PS    | 2.7                                 |
| HC-CA    | 2.8                                 |
| HC-SBPB  | 3.0                                 |
| HC-PUCF  | 2.9                                 |
| HC-PC    | 3.0                                 |

**S20** Comparison of the spectra of C1s, O1s, N1s, Si2p and I3d of the HC-FSD and HC-FSD-5Cy samples

**Figure S20.** Comparison of the spectra of C 1s, O1s, N1s, Si 2p and I 3d of the HC-FSD and HC-FSD-5Cy samples

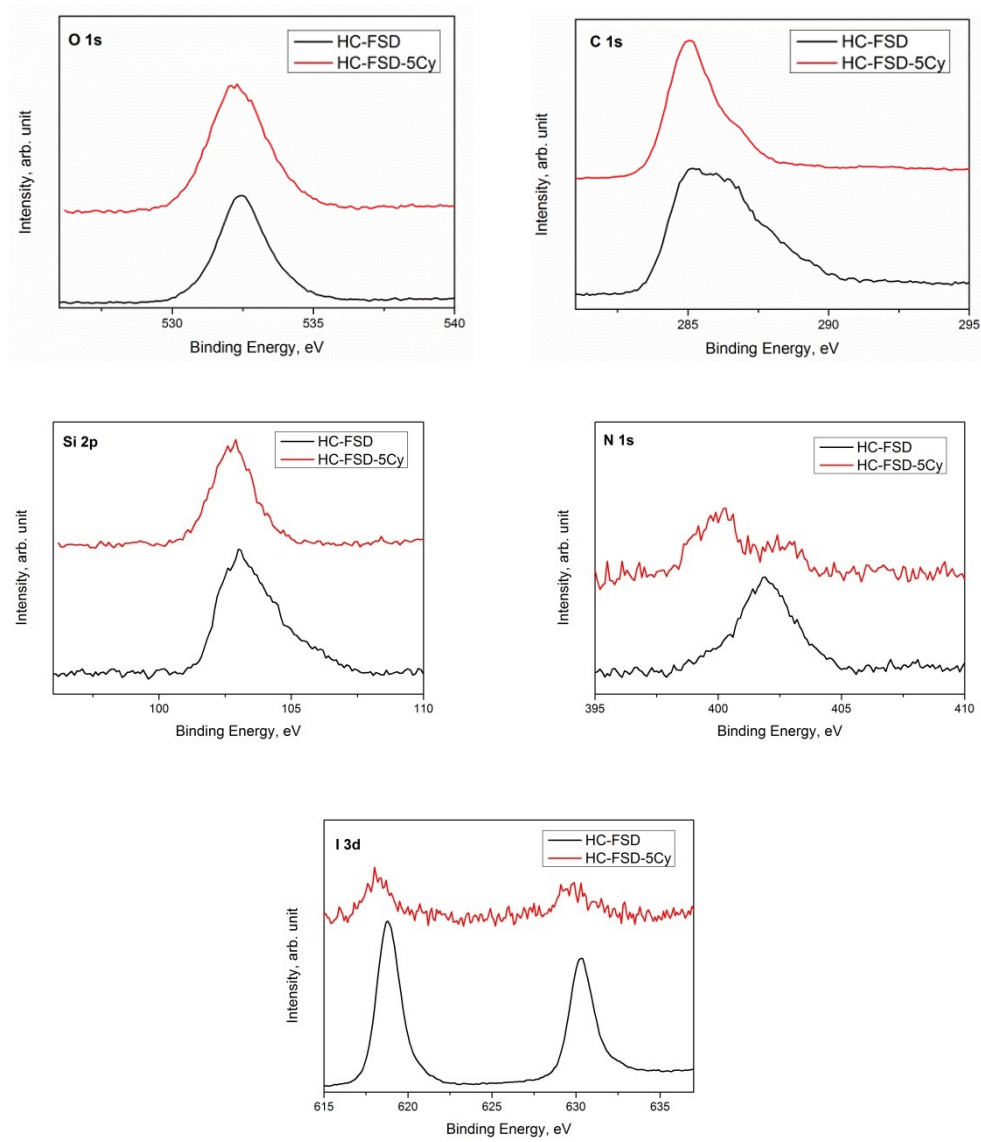

## Bibliography

- 1 J. L. Vidal, V. P. Andrea, S. L. MacQuarrie and F. M. Kerton, *ChemCatChem*, 2019, **11**, 4089–4095.
- 2 V. B. Saptal, T. Sasaki, K. Harada, D. Nishio-Hamane and B. M. Bhanage, *ChemSusChem*, 2016, **9**, 644–650.
- 3 D. H. Lan, L. Chen, C. T. Au and S. F. Yin, *Carbon N. Y.*, 2015, **93**, 22–31.
- 4 K. R. Roshan, T. Jose, A. C. Kathalikkattil, D. W. Kim, B. Kim and D. W. Park, *Appl. Catal. A Gen.*, 2013, **467**, 17–25.
- 5 X. Wu, M. Wang, Y. Xie, C. Chen, K. Li, M. Yuan, X. Zhao and Z. Hou, *Appl. Catal. A Gen.*, 2016, **519**, 146–154.
- 6 Z. Wu, H. Xie, X. Yu and E. Liu, *ChemCatChem*, 2013, **5**, 1328–1333.
- 7 X. Xiong, H. Zhang, S. L. Lai, J. Gao and L. Gao, *React. Funct. Polym.*, 2020, **149**, 104502.
- 8 S. Lai, J. Gao, H. Zhang, L. Cheng and X. Xiong, *J. CO<sub>2</sub> Util.*, 2020, **38**, 148–157.
- 9 J. Tharun, Y. Hwang, R. Roshan, S. Ahn, A. C. Kathalikkattil and D. W. Park, *Catal. Sci. Technol.*, 2012, **2**, 1674–1680.
- 10 M. Borjian Boroujeni, M. S. Laeini, M. T. Nazeri and A. Shaabani, *Catal. Letters*, 2019, **149**, 2089–2097.
- 11 S. Kumar, K. Prasad, J. M. Gil, A. J. F. N. Sobral and J. Koh, *Carbohydr. Polym.*, 2018, **198**, 401–406.
- 12 C. Guizani, M. Jeguirim, S. Valin, L. Limousy and S. Salvador, *Energies*, 2017, **10**, 796.
- 13 R. Sun, X. Zhang, C. Wang and Y. Cao, *J. Environ. Chem. Eng.*, 2021, **9**, 105368.
- 14 C. Nieto-Delgado, F. S. Cannon, Z. Zhao and P. G. Nieto-Delgado, *Fuel*, 2021, **298**, 120816.
- 15 R. M. Silverstein, F. X. Webster and D. J. Kiemle, *John Wiley Sons, Inc*, 2005.
- 16 L. T. Cuba-Chiem, L. Huynh, J. Ralston and D. A. Beattie, *Langmuir*, 2008, **24**, 8036–8044.
- 17 A. O. Odeh, *Ranliao Huaxue Xuebao/Journal Fuel Chem. Technol.*, 2015, **43**, 129–137.
- 18 C. Samorí, C. Torri, D. Fabbri, G. Falini, C. Faraloni, P. Galletti, S. Spera, E. Tagliavini and G. Torzillo, *ChemSusChem*, 2012, **5**, 1501–1512.
- 19 S. Pradhan, J. Hedberg, J. Rosenqvist, C. M. Jonsson, S. Wold, E. Blomberg and I. O. Wallinder, *PLoS One*, 2018, **13**, 1–24.
- 20 C. J. Pouchert, *The Aldrich library of FT-IR spectra.*, Aldrich, Milwaukee, Wis, Ed. 2., 1975.
- 21 C. Le Losq, G. D. Cody and B. O. Mysen, *Am. Mineral.*, 2015, **100**, 945–950.
